# Supplementary material for: Impact of DSMES app interventions on medication adherence in type 2 diabetes mellitus: systematic review and meta-analysis
Source: HighWire-hosted journal article supplement (doi:10.1136/bmjhci-2020-100291), 2021-04-01
Supplement: bmjhci-2020-100291supp001_data_supplement.pdf [file bmjhci-2020-100291supp001_data_supplement.pdf]

## Impact of DSMES-app interventions on Medication Adherence in Type 2 Diabetes Mellitus: Systematic Review & Meta-Analysis

Table S1. Search Strategy used in Cochrane Controlled Register of Trials (CENTRAL)

| ID  | Search Details                                                                                                                                                                             | Number |
|-----|--------------------------------------------------------------------------------------------------------------------------------------------------------------------------------------------|--------|
| #1  | [Diabetes Mellitus, Type 2] explode all trees                                                                                                                                              | 17351  |
| #2  | [Telemedicine] explode all trees                                                                                                                                                           | 2438   |
| #3  | [Self-Management] explode all trees and with qualifier(s): [education - ED]                                                                                                                | 39     |
| #4  | "self-management education" OR "self-management support" OR "diabetes education" OR "health promotion" OR "patient education" OR "health education"                                        | 34078  |
| #5  | [Medication Adherence] explode all trees                                                                                                                                                   | 2189   |
| #6  | [Patient Compliance] explode all trees                                                                                                                                                     | 11739  |
| #7  | "cell phone" OR "cellphone" OR "cellular phone" OR "cellular telephone" OR "mobile phone" OR "mobile telephone" OR "mobile applications" OR "mobile apps" OR "text messaging" OR "texting" | 5554   |
| #8  | #3 OR #4                                                                                                                                                                                   | 34087  |
| #9  | #7 OR #2                                                                                                                                                                                   | 7593   |
| #10 | #5 OR #6                                                                                                                                                                                   | 11739  |
| #11 | #1 AND #8                                                                                                                                                                                  | 1285   |
| #12 | #11 AND #9                                                                                                                                                                                 | 101    |
| #13 | #12 AND #10                                                                                                                                                                                | 11     |

Figure S2. Intervention Effect on Medication Adherence at 0.2 pre/post correlation

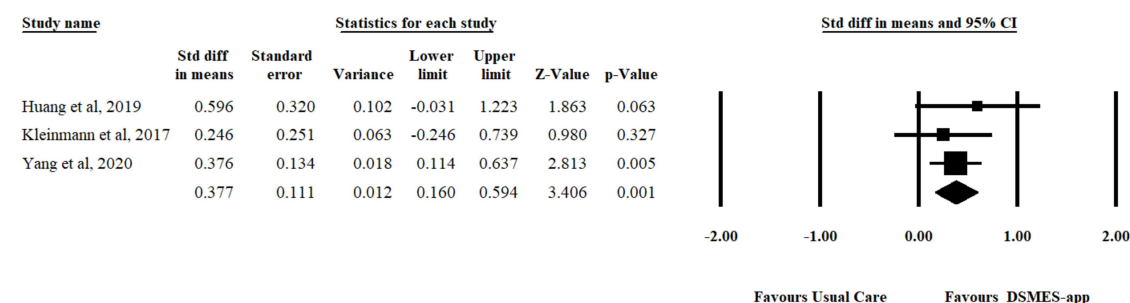

Figure S3. Intervention Effect on Medication Adherence at 0.8 pre/post correlation

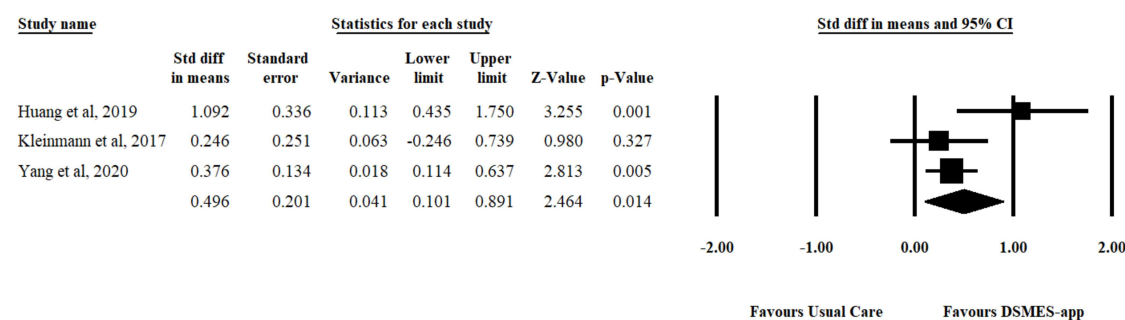

Figure S4. Intervention Effect on HbA1c at 0.2 pre/post correlation

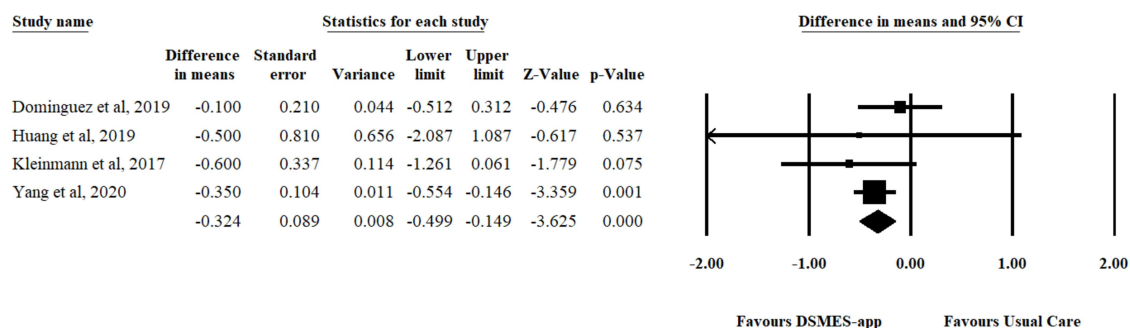

HbA1c: Glycosylated Hemoglobin

Figure S5. Intervention Effect on HbA1c at 0.8 pre/post correlation

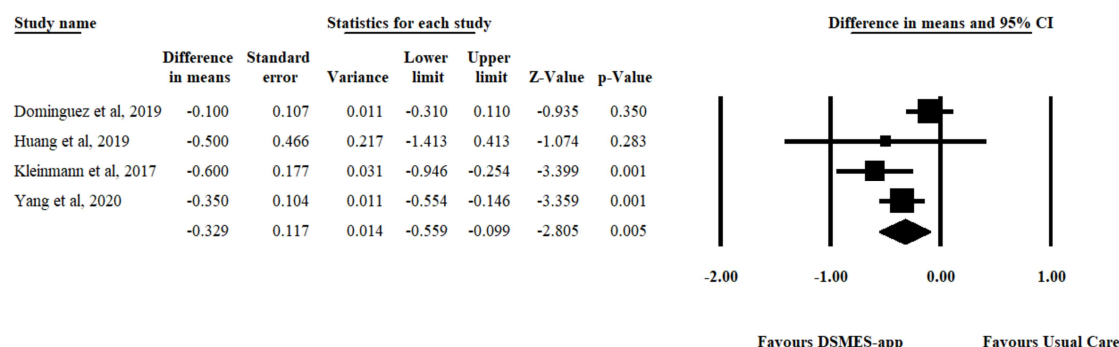

HbA1c: Glycosylated Hemoglobin

Figure S6. Intervention Effect on BMI at 0.2 pre/post correlation

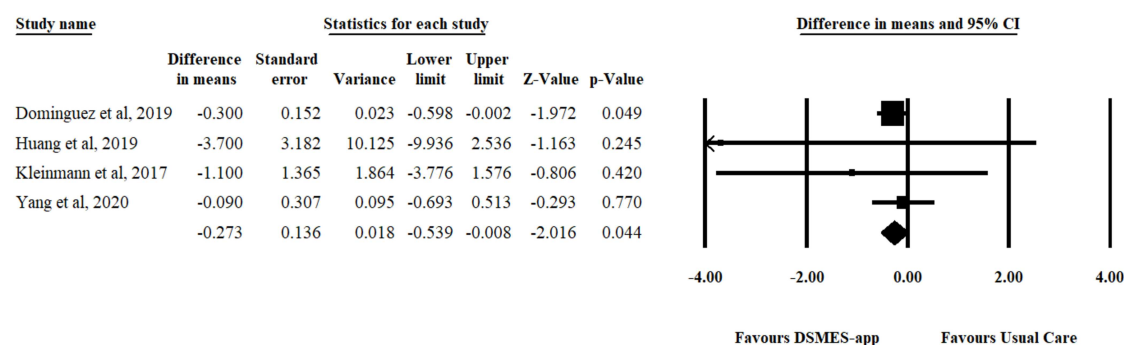

Figure S7. Intervention Effect on BMI at 0.8 pre/post correlation

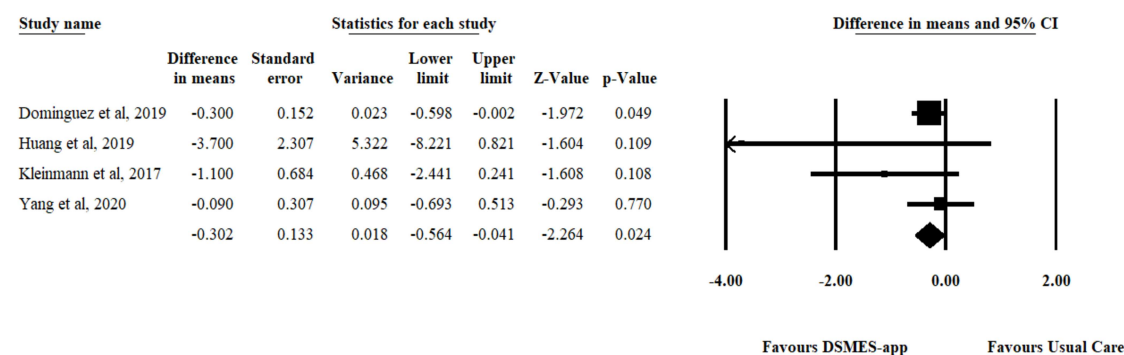

BMI: Body Mass Index
